# Supplementary material for: Phytochemical Characterization of Olea europaea L. Cultivars of Cilento National Park (South Italy) through NMR-Based Metabolomics
Source: MDPI journal article supplement (doi:10.3390/molecules26133845), 2021-06-24
Supplement: s1 [file s1]

# Phytochemical Characterization of *Olea europaea* L. Cultivars of Cilento National Park (South Italy) through NMR-Based Metabolomics

Assunta Esposito <sup>1</sup>, Pietro Filippo De Luca<sup>1</sup>, Vittoria Graziani<sup>1</sup>, Brigida D'Abrosca<sup>1</sup>, Antonio Fiorentino<sup>1,\*</sup> and Monica Scognamiglio <sup>1</sup>

## SUPPLEMENTARY MATERIAL

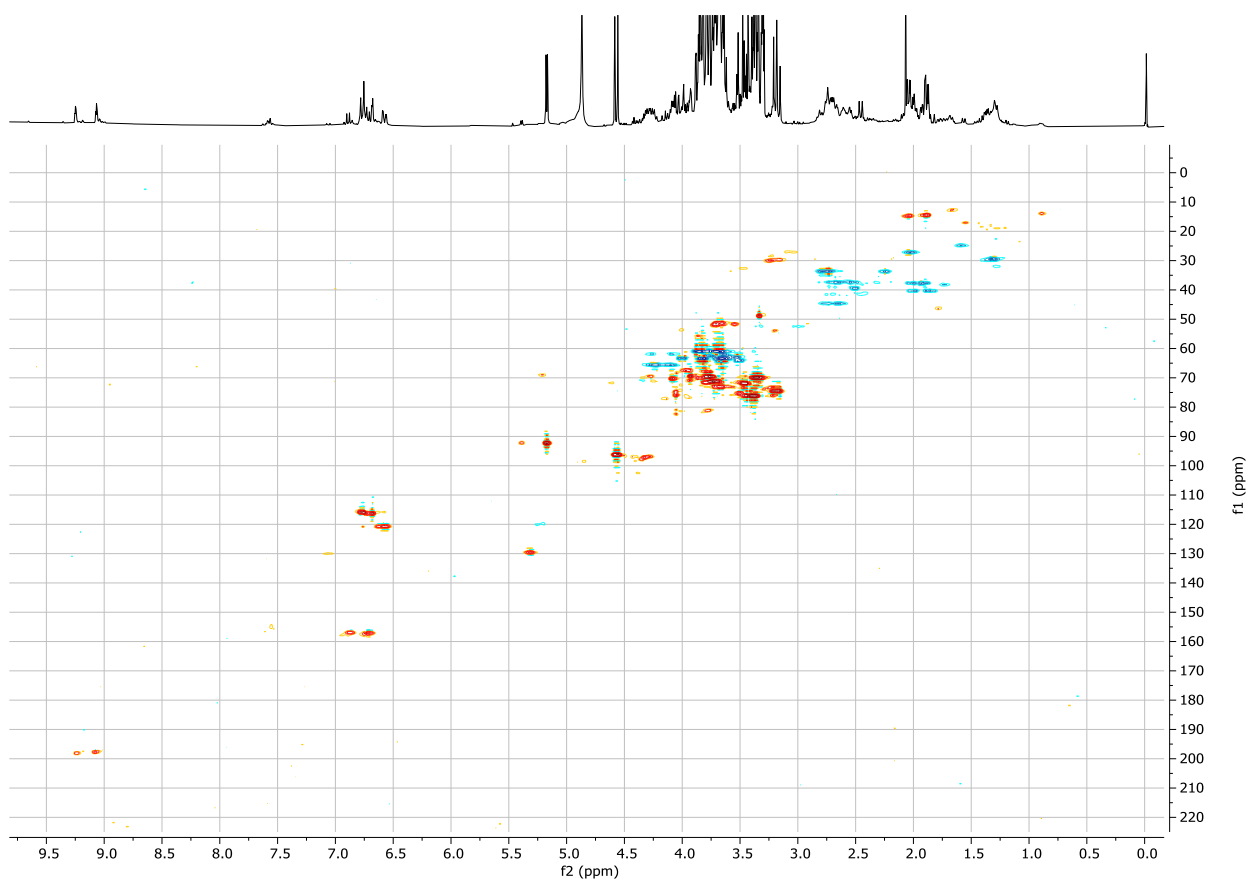

**Figure S1.** HSQC of Cammarotana cultivar

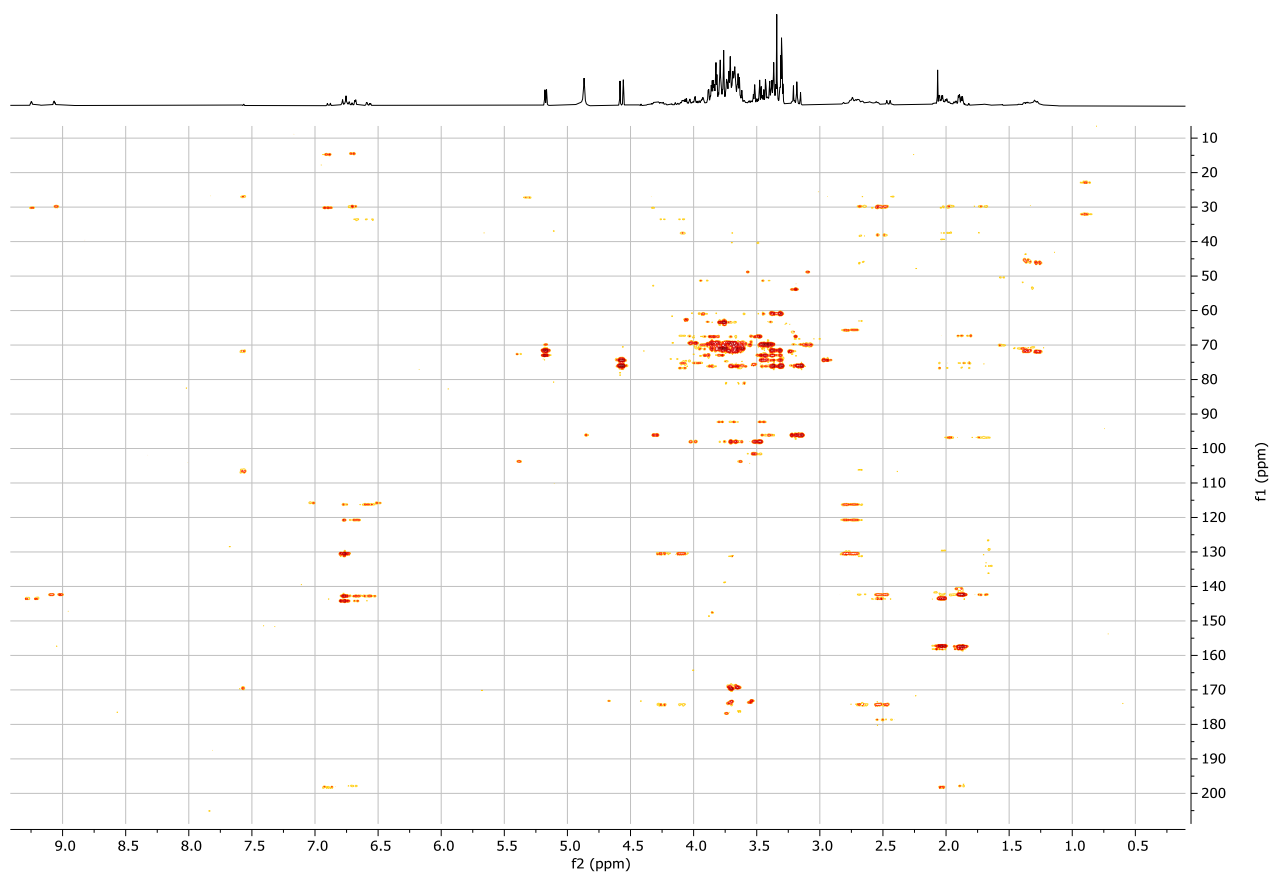

**Figure S2.** HMBC of Cammarotana cultivar

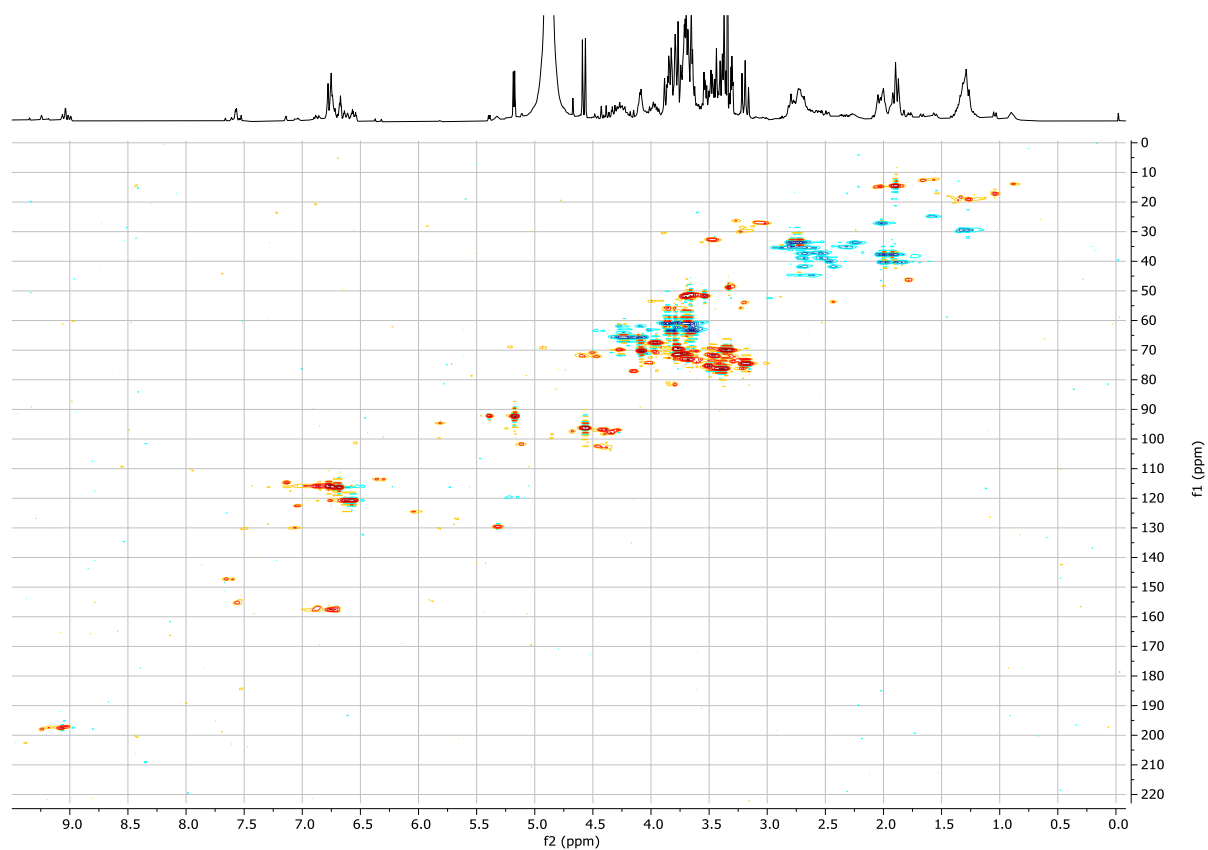

**Figure S3.** HSQC of Pisciotiana cultivar

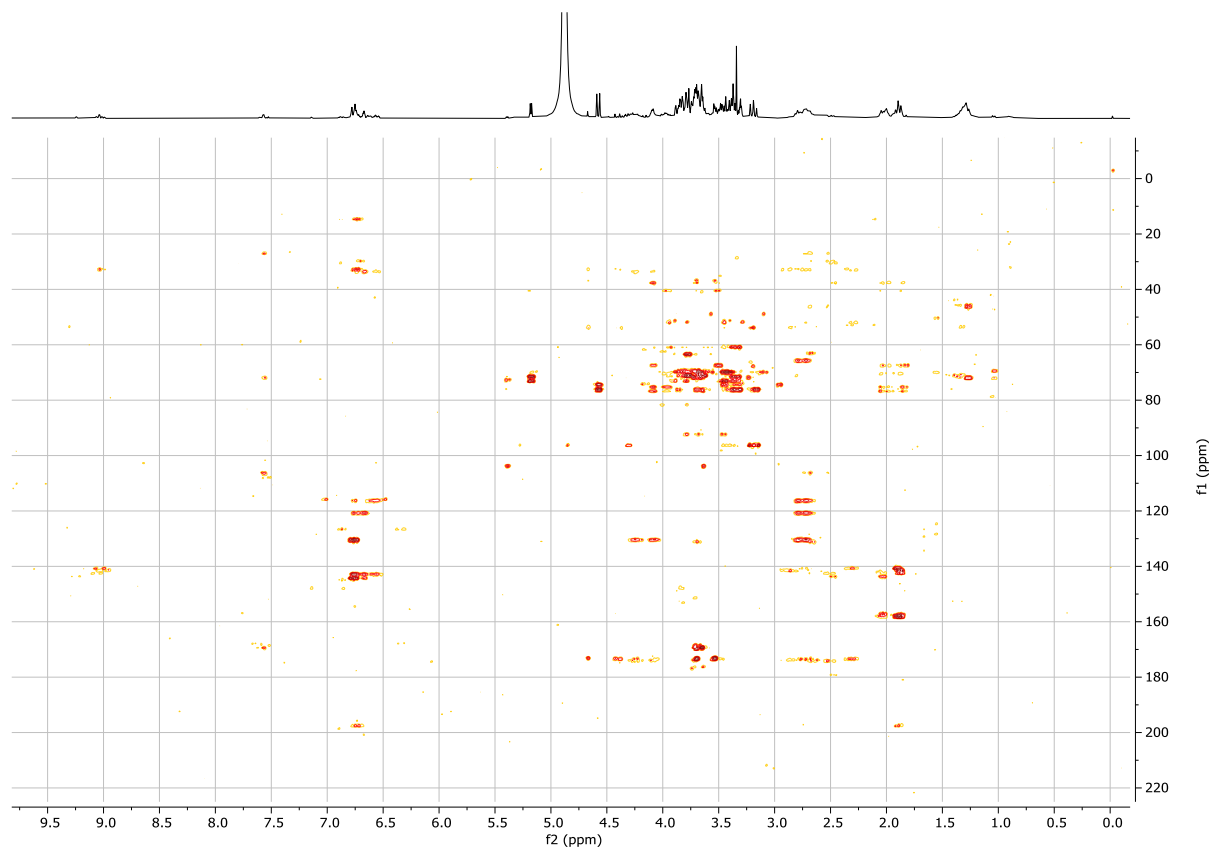

**Figure S4.** HMBC of Pisciotiana cultivar

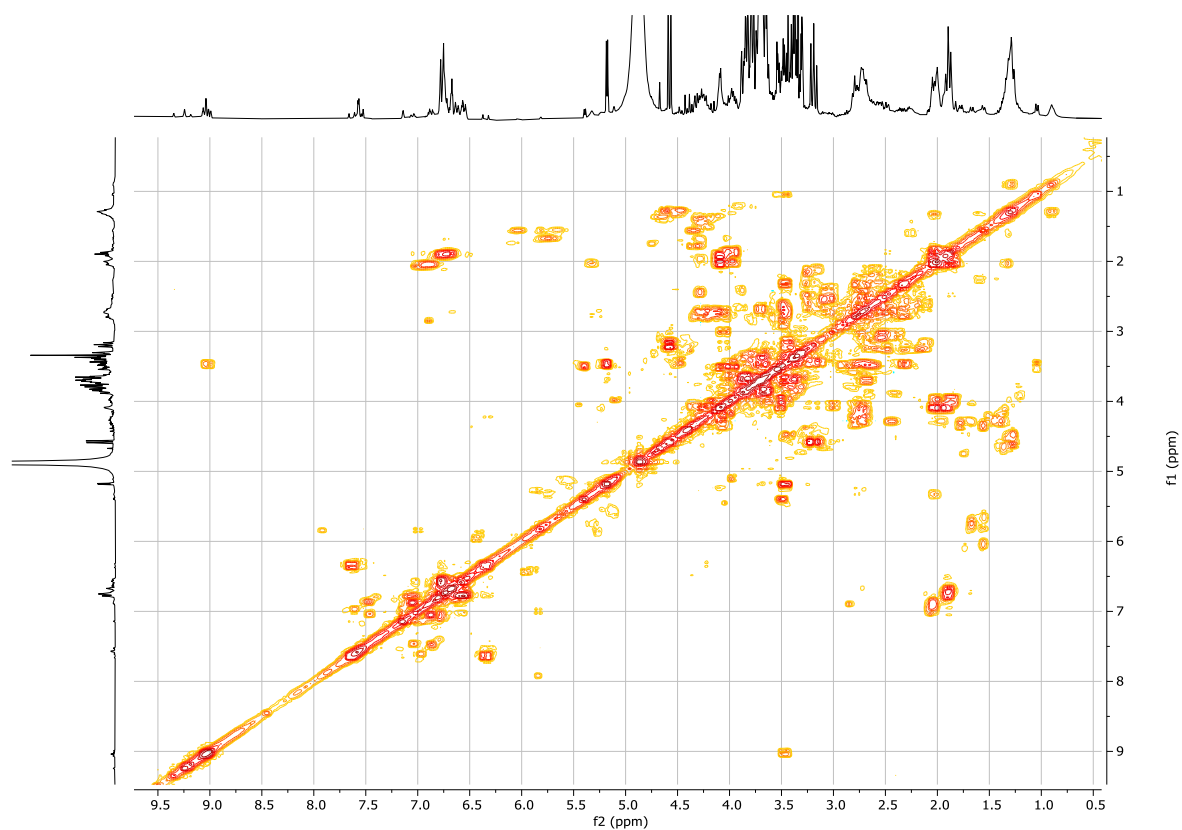

**Figure S5.** COSY of Pisciotiana cultivar

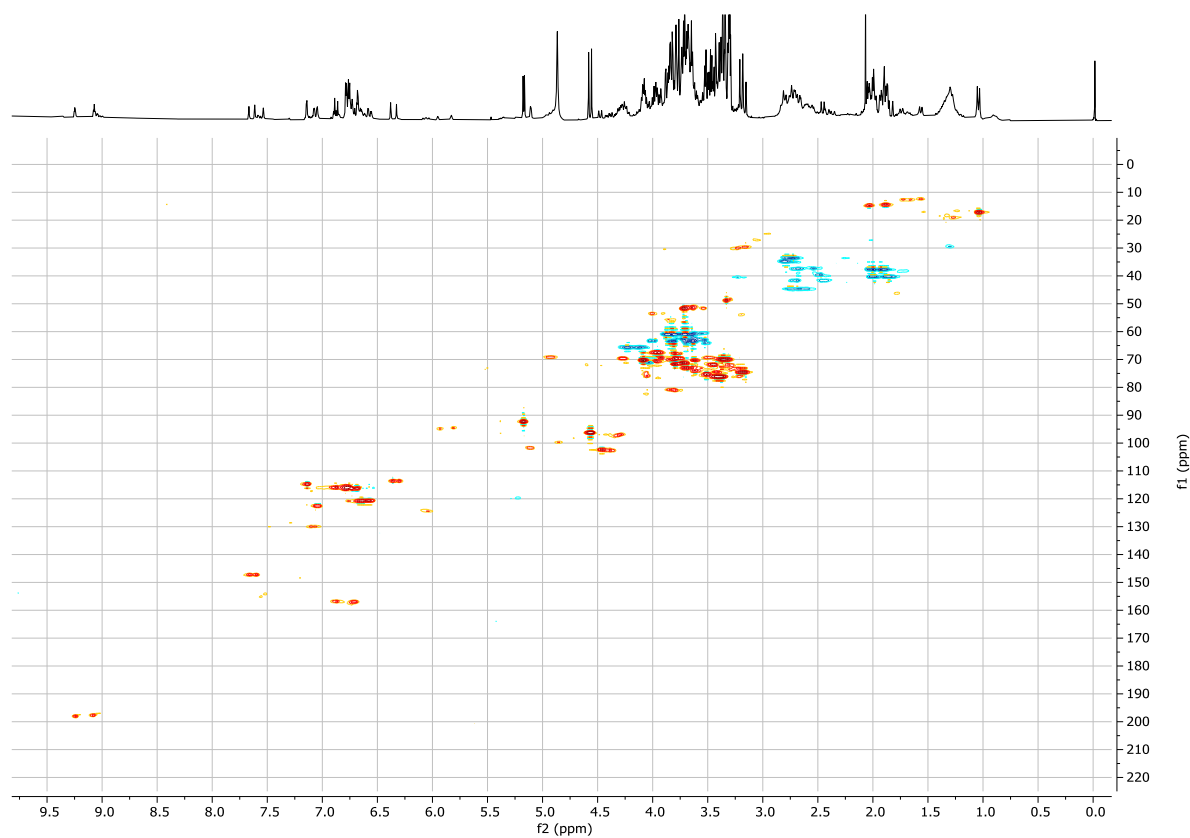

**Figure S6.** HSQC of Racioppa cultivar

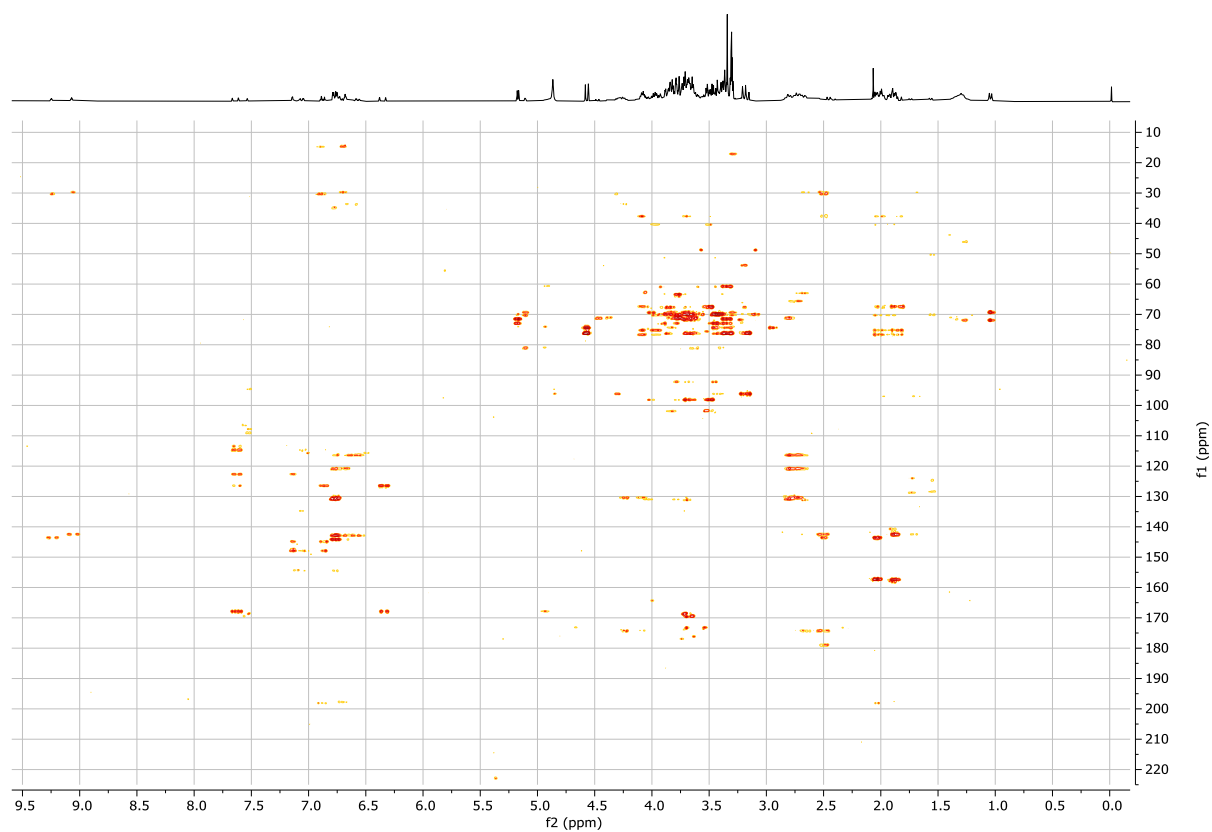

Figure S7. HMBC of Racioppa cultivar

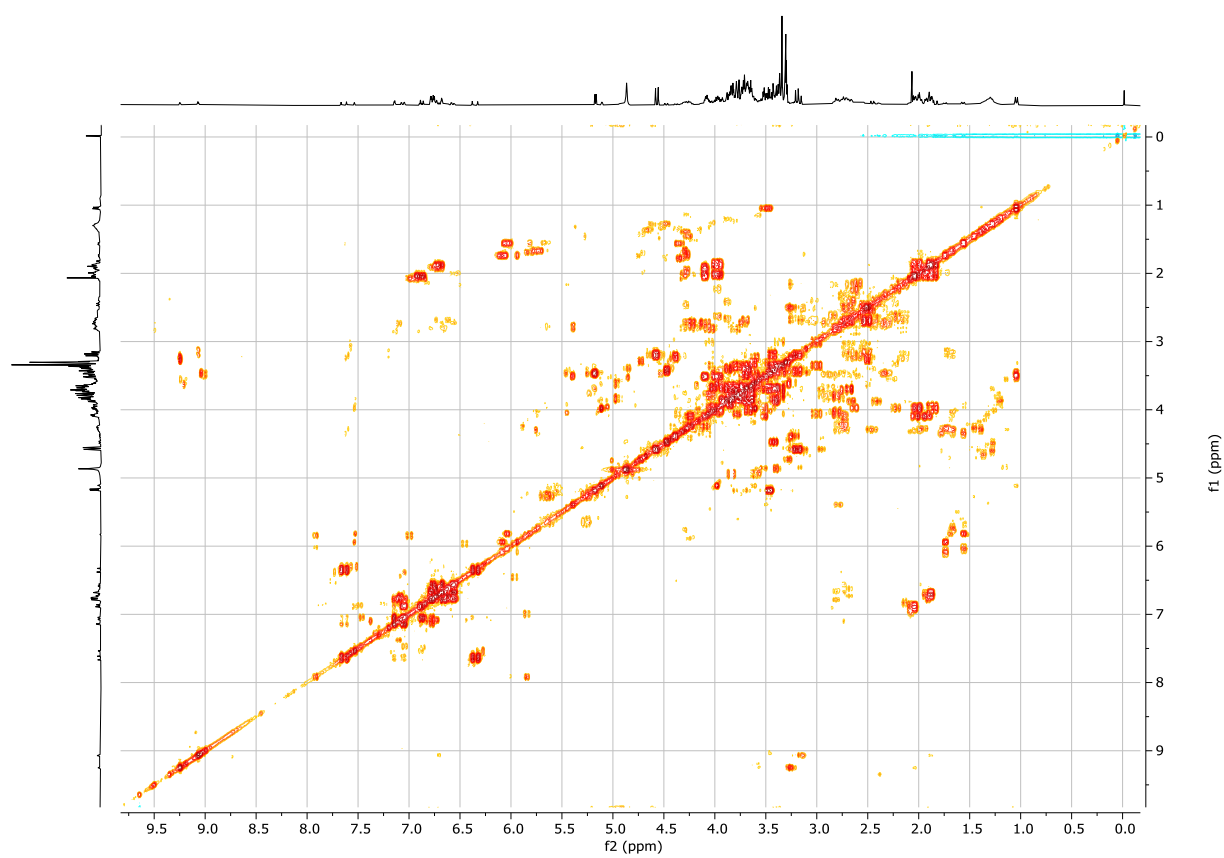

Figure S8. COSY of Racioppa cultivar

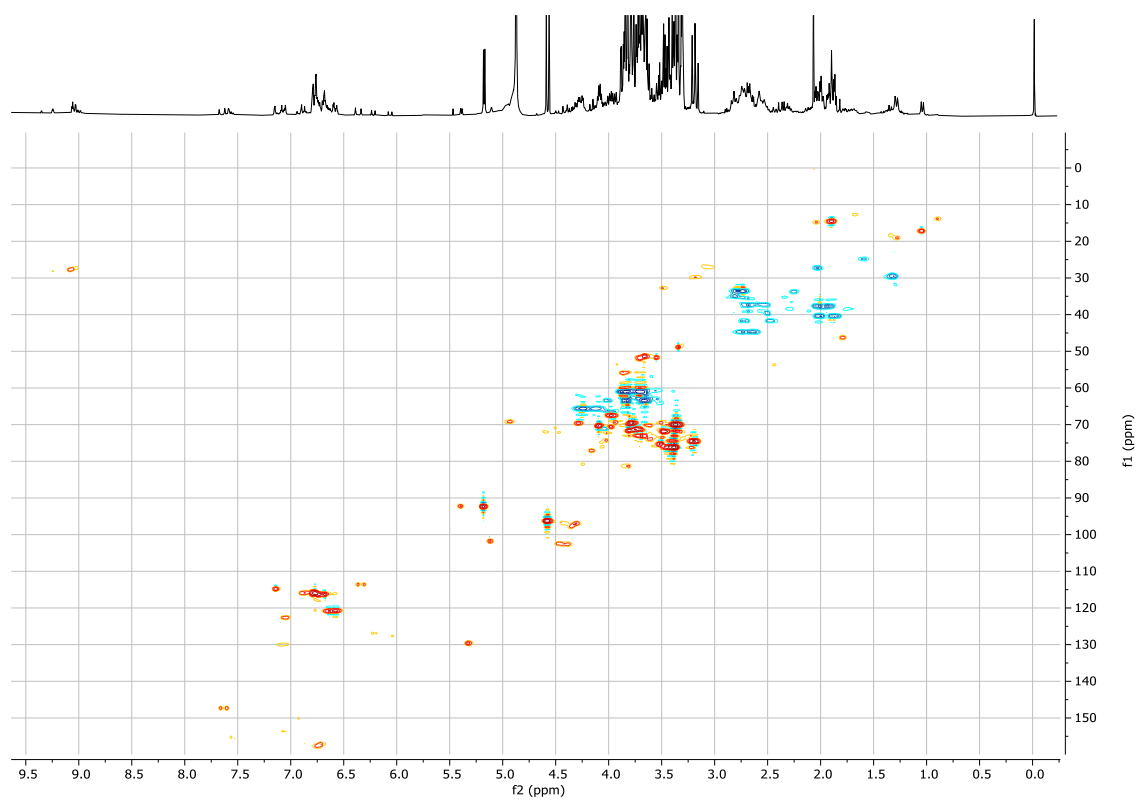

**Figure S9.** HSQC of Grossale cultivar

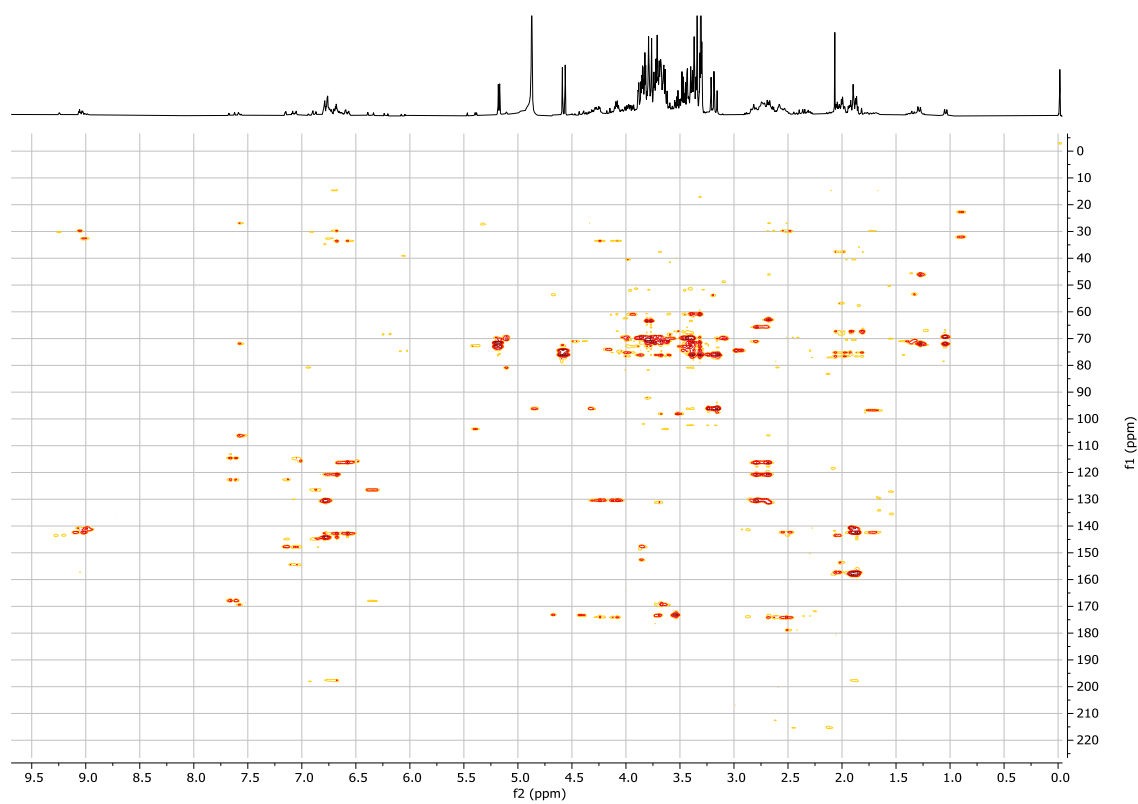

**Figure S10.** HMBC of Grossale cultivar
